# Supplementary material for: Reduced ITPase activity and favorable IL28B genetic variant protect against ribavirin-induced anemia in interferon-free regimens
Source: PubMed Central journal article supplement (PMC5979032; doi:10.1371/journal.pone.0198296), 2018-05-31
Supplement: pone.0198296.s001.pdf [file pone.0198296.s001.pdf]

**S1 Fig. Hb Change Least Square Means by Treatment Arm**

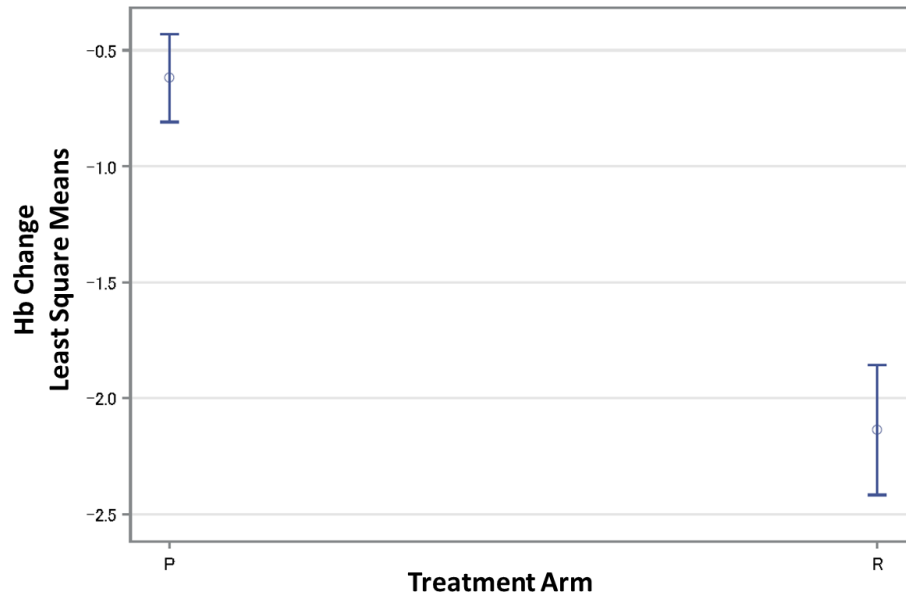

**S1 Fig.** The least square means were calculated for Hb change using age, gender, and *rs12979860* genotype and ITPase functional activity for the 2 arms. Circles indicate the LS means, error bars indicate the 95% confidence interval of the LS-means. P= DAA + placebo; R= DAA + Ribavirin  
Hb Change LS Mean for Placebo Arm (P)= -0.6189 (SE=0.0961)  
Hb Change LS Mean for Ribavirin Arm (R)=-2.136 (SE=0.1417)  
There was a significant drop in Hb levels in RBV-containing arm (P<0.001)
