# Supplementary material for: Reduced ITPase activity and favorable IL28B genetic variant protect against ribavirin-induced anemia in interferon-free regimens
Source: PubMed Central journal article supplement (PMC5979032; doi:10.1371/journal.pone.0198296), 2018-05-31
Supplement: pone.0198296.s003.pdf [file pone.0198296.s003.pdf]

**S3 Fig. Hb Change as a Function of Sex**

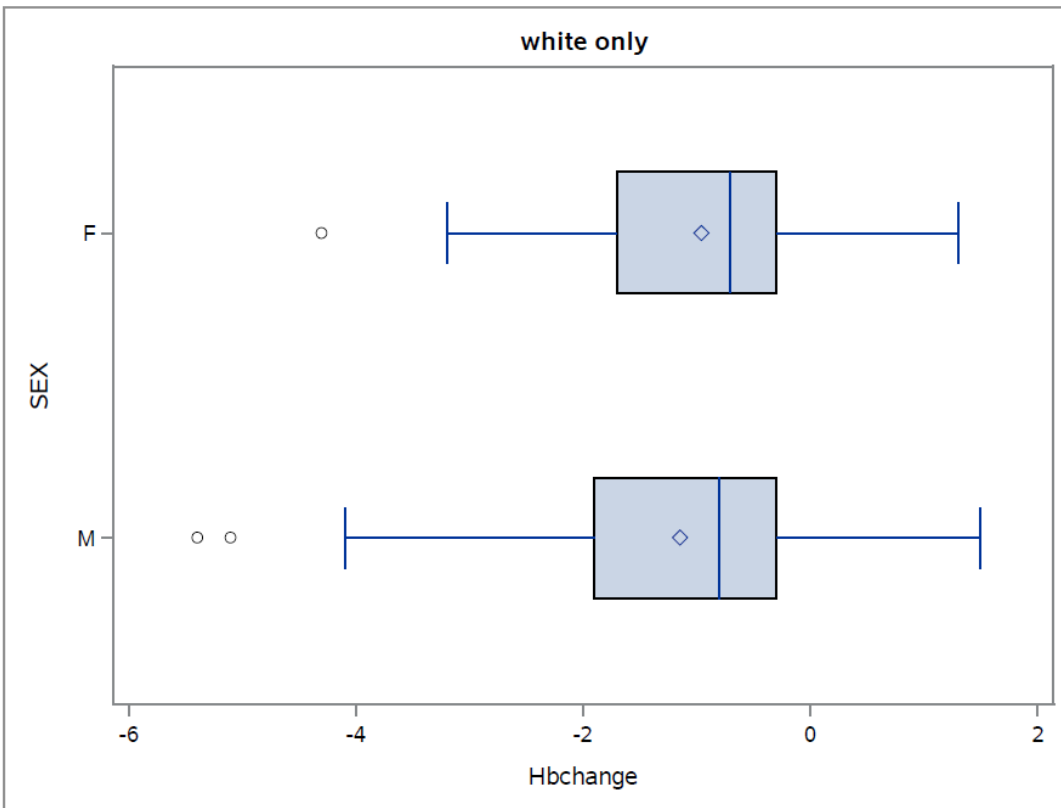

**S3 Fig.** Box and whiskers plots show means and 95% Confidence intervals. No observable significant differences in Hb changes between male (M) and female (F) patients.
