# Supplementary material for: Reduced ITPase activity and favorable IL28B genetic variant protect against ribavirin-induced anemia in interferon-free regimens
Source: PubMed Central journal article supplement (PMC5979032; doi:10.1371/journal.pone.0198296), 2018-05-31
Supplement: pone.0198296.s004.pdf [file pone.0198296.s004.pdf]

**S4 Fig. Log<sub>2</sub>C<sub>trough</sub> Least Square means by rs12979860 Genotype**

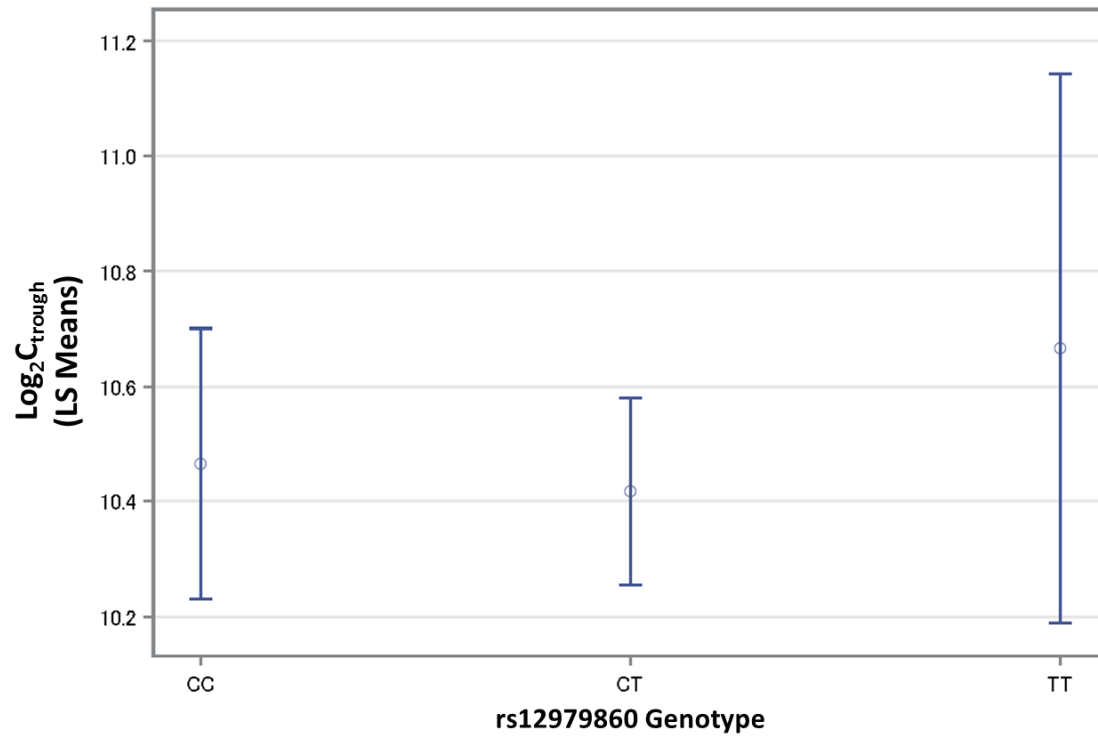

**S4 Fig.** The least square means were calculated for Log<sub>2</sub>(C<sub>trough</sub>) for ribavirin using age, sex, arm, ITPase function for the *rs12979860* genotype. Circles indicate the LS means, error bars indicate the 95% confidence interval of the LS-means. We found no significant differences between the three genotypes for Log<sub>2</sub>(C<sub>trough</sub>) values for ribavirin.
