# Supplementary material for: Reduced ITPase activity and favorable IL28B genetic variant protect against ribavirin-induced anemia in interferon-free regimens
Source: PubMed Central journal article supplement (PMC5979032; doi:10.1371/journal.pone.0198296), 2018-05-31
Supplement: pone.0198296.s005.pdf [file pone.0198296.s005.pdf]

**S5 Fig. Change in PLT counts as a function of rs12979860 genotype**

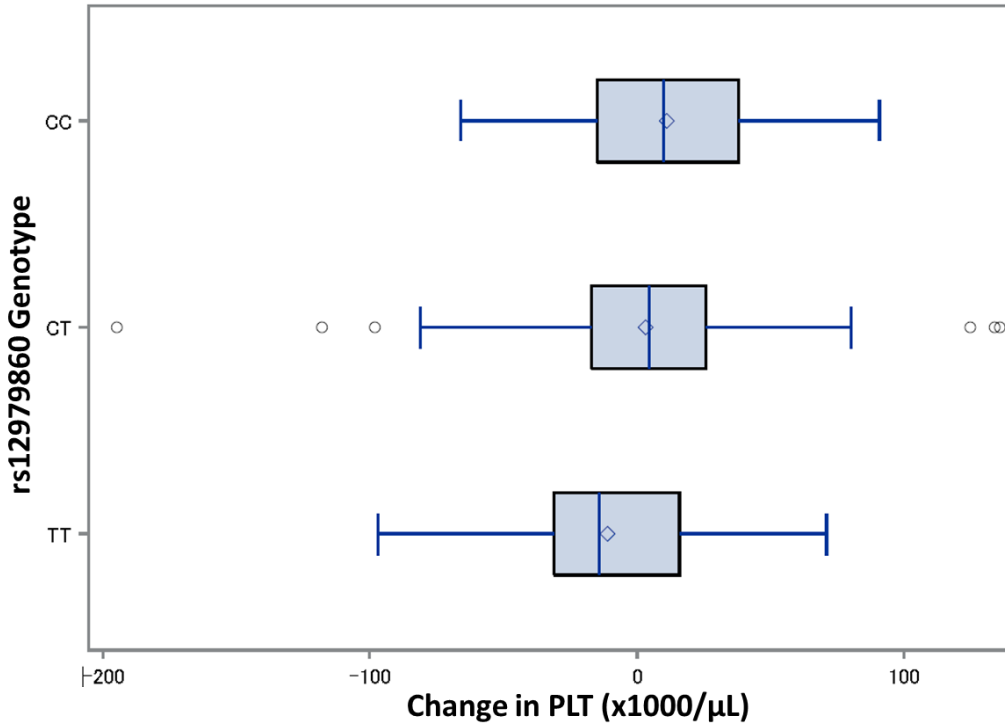

**S5 Fig.** Overall shifts in PLT change plotted out as a function of rs12979860 genotype. Box and whiskers plots show means and 95% Confidence intervals. We did not observe significant differences in PLT changes between subjects carrying CC, CT, and TT genotypes at theIL-28b locus.
