# Supplementary material for: Reduced ITPase activity and favorable IL28B genetic variant protect against ribavirin-induced anemia in interferon-free regimens
Source: PubMed Central journal article supplement (PMC5979032; doi:10.1371/journal.pone.0198296), 2018-05-31
Supplement: pone.0198296.s006.pdf [file pone.0198296.s006.pdf]

**S6 Fig. Estimated Change in PLT counts by an Interaction of treatment arm and rs12979860 genotype**

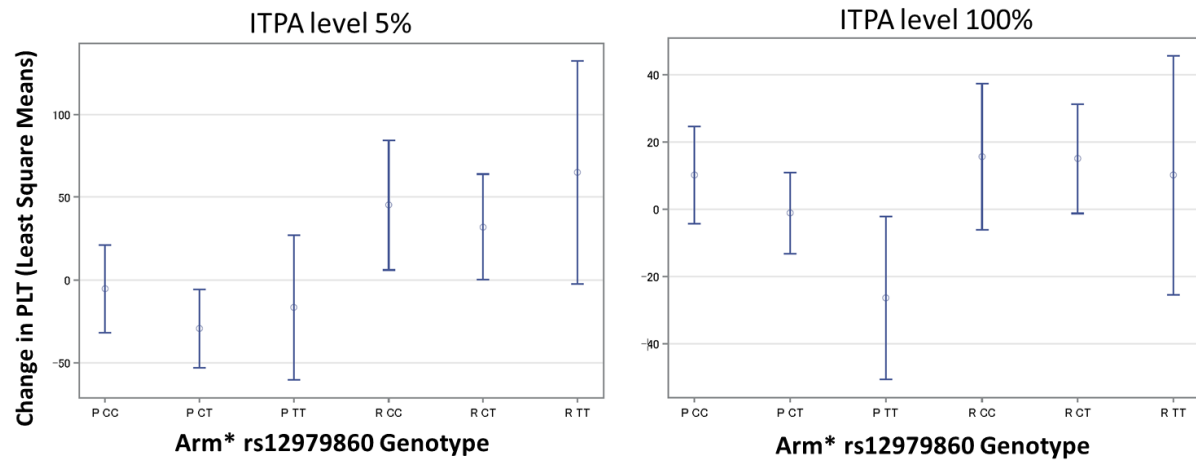

**S6 Fig.** The least square means were calculated for platelet change from baseline to EOT using age and sex as covariates. Circles indicate the LS means, error bars indicate the 95% confidence interval of the LS-means. At the ITPase functional levels 5% (A) and 100% (B), there are significant differences between arms, but no significant association with *rs12979860* genotype. P=Placebo treatment arm, R=RBV treatment arm.
