# Supplementary material for: Reduced ITPase activity and favorable IL28B genetic variant protect against ribavirin-induced anemia in interferon-free regimens
Source: PubMed Central journal article supplement (PMC5979032; doi:10.1371/journal.pone.0198296), 2018-05-31
Supplement: pone.0198296.s007.pdf [file pone.0198296.s007.pdf]

**S1 Table. List of IRB sites in which pharmacogenetic analysis was approved**

| #  | Site Name                                                         | Approving IRB/IEC                                               |
|----|-------------------------------------------------------------------|-----------------------------------------------------------------|
| 1  | Queen Alexandra Hospital, Portsmouth, UK                          | NRES committee London City and East, Bristol, UK                |
| 2  | Medical Associates Research Group, San Diego, CA, USA             | Quorum Review IRB, Seattle WA USA                               |
| 3  | North Shore- Long Island Jewish Health System, Manhasset, NY, USA | Biomedical research Alliance of New York, Lake Success, NY, USA |
| 4  | Delta Research Partners, Bastrop, LA, USA                         | Quorum Review IRB, Seattle WA USA                               |
| 5  | Clinical Research Centers of America, Murray, UT, USA             | Quorum Review IRB, Seattle WA USA                               |
| 6  | Metropolis medical group San Francisco CA, USA                    | Quorum Review IRB, Seattle WA USA                               |
| 7  | St Marys Hospital, London, UK                                     | NRES committee London –London Bridge, London, UK                |
| 8  | Ottawa Hospital, Ottawa ON, Canada                                | Ottawa Hospital Research Ethics board, Ottawa, ON, Canada       |
| 9  | Clinique Medicale du Quartier Latin, Montreal, QC, Canada         | Quorum Review IRB, Seattle WA USA                               |
| 10 | Derriford Hospital, Plymouth, UK                                  | NRES committee London City and East, Bristol, UK                |
| 11 | South Florida Center of Gastroenterology, Wellington, FL, USA     | Quorum Review IRB, Seattle WA USA                               |
| 12 | The Royal Free Hospital, London, UK                               | NRES committee London City and East, Bristol, UK                |
| 13 | Florida Medical Clinic Zephyrhills, FL, USA                       | Quorum Review IRB, Seattle WA USA                               |
| 14 | Toronto Liver Center, Toronto, ON, Canada                         | Quorum Review IRB, Seattle WA USA                               |
| 15 | Kaiser Permanente, San Francisco, CA, USA                         | Kaiser Permanente Northern California IRB, Oakland, CA, USA     |
| 16 | St. George’s Hospital, London, UK                                 | NRES committee London City and East, Bristol, UK                |
| 17 | Chelsea and Westminster Hospital, London, UK                      | NRES committee London –London Bridge, London, UK                |
| 18 | Kansas City research Institute, Kansas City, MO, USA              | Quorum Review IRB, Seattle WA USA                               |
| 19 | Cure C Consortium, Houston, TX, USA                               | Quorum Review IRB, Seattle WA USA                               |
| 20 | Wisconsin Center for Advanced Research, Milwaukee, WI, USA        | Quorum Review IRB, Seattle WA USA                               |
| 21 | eStudySite, La Mesa, CA, USA                                      | Quorum Review IRB, Seattle WA USA                               |
| 22 | The Ohio State University Wexner, Columbus, OH, USA               | Western Institutional Review board, Olympia, WA, USA            |
| 23 | Charlotte Gastroenterology and hepatology, Charlotte, NC, USA     | Quorum Review IRB, Seattle WA USA                               |
| 24 | Southern California Research Center, Coronado, CA, USA            | Quorum Review IRB, Seattle WA USA                               |
| 25 | Quality medical Research, Nashville, TN,                          | Quorum Review IRB, Seattle WA USA                               |

|    |                                                                                        |                                                      |
|----|----------------------------------------------------------------------------------------|------------------------------------------------------|
|    | USA                                                                                    |                                                      |
| 26 | Inland Empire Liver Foundation, Rialto CA, USA                                         | Quorum Review IRB, Seattle WA USA                    |
| 27 | Tampa General Medical Group, Tampa General Hospital, Tampa, FL< USA                    | Quorum Review IRB, Seattle WA USA                    |
| 28 | Trial management Assocaites, Wilmington, NC, USA                                       | Quorum Review IRB, Seattle WA USA                    |
| 29 | Quest Clinical research, San Francisco, CA, USA                                        | Quorum Review IRB, Seattle WA USA                    |
| 30 | Clinique medicale L'Actuel, Montreal, QC, Canada                                       | Quorum Review IRB, Seattle WA USA                    |
| 31 | eStudySite, Oceanside, CA, USA                                                         | Quorum Review IRB, Seattle WA USA                    |
| 32 | eStudySite, San Diego, CA, USA                                                         | Quorum Review IRB, Seattle WA USA                    |
| 33 | ID Care of New jersey, Hillsborough, NJ, USA                                           | Quorum Review IRB, Seattle WA USA                    |
| 34 | Tampa General medical Group, Tampa General Hospital, Tampa, FL, USA                    | Quorum Review IRB, Seattle WA USA                    |
| 35 | Midland Florida Clinical Research, DeLand, FL, USA                                     | Quorum Review IRB, Seattle WA USA                    |
| 36 | Triple O Research Institute, West Palm Beach, FL, USA                                  | Quorum Review IRB, Seattle WA USA                    |
| 37 | eStudySite, Chula Vista, CA, USA                                                       | Quorum Review IRB, Seattle WA USA                    |
| 38 | Gartnavel General Hospital, Glasgow, Scotland, US                                      | NRES committee London City and East, Bristol, UK     |
| 39 | Midway Immunology and Research Center, Fort Pierce, FL, USA                            | Quorum Review IRB, Seattle WA USA                    |
| 40 | GIRI Gastrointestinal Research Institute, Vancouver, BC, Canada                        | Quorum Review IRB, Seattle WA USA                    |
| 41 | Atlanta Center for Gastroenterology PC, Decatur, GA, USA                               | Quorum Review IRB, Seattle WA USA                    |
| 42 | Consultants for Clinical Research, Cincinnati, OH, USA                                 | Quorum Review IRB, Seattle WA USA                    |
| 43 | Abbott Northwestern Hospital, Minneapolis, MN, USA                                     | Quorum Review IRB, Seattle WA USA                    |
| 44 | Orange Coast Medical Group, Newport beach, CA, USA                                     | Quorum Review IRB, Seattle WA USA                    |
| 45 | Peter J Ruane, MD, Inc., Los Angeles, CA, USA                                          | Quorum Review IRB, Seattle WA USA                    |
| 46 | Metropolitan Research, Annandale, VA, USA                                              | Quorum Review IRB, Seattle WA USA                    |
| 47 | University Hospital Queen's Medical Centre, Nottingham, UK                             | NRES committee London City and East, Bristol, UK     |
| 48 | University of Alabama at Birmingham, Center for AIDS Research UAB, Birmingham, AL, USA | Western Institutional Review Board, Olympia, WA, USA |
| 49 | Aga Clinical Research Associates, LLC, Egg Harbor Township, NJ, USA                    | Quorum Review IRB, Seattle WA USA                    |

|    |                                                                         |                                                                                                                                           |
|----|-------------------------------------------------------------------------|-------------------------------------------------------------------------------------------------------------------------------------------|
| 50 | University Gastroenterology, providence RI, USA                         | Quorum Review IRB, Seattle WA USA                                                                                                         |
| 51 | LAIR Centre, Vancouver, BC, Canada                                      | Quorum Review IRB, Seattle WA USA                                                                                                         |
| 52 | The Queens medical Center, Honolulu, HI, USA                            | The Queens medical Center Institutional and Research Review Committee, Honolulu, HI, USA                                                  |
| 53 | UCSD Antiviral Research Center, San Diego, CA, USA                      | University of California- San Diego, Human research protections Program, La Jolla, CA, USA                                                |
| 54 | Gastro One, Germantown, TN, USA                                         | Quorum Review IRB, Seattle WA USA                                                                                                         |
| 55 | Inova Fairfax Hospital Center for Liver Diseases, Falls Church, VA, USA | Quorum Review IRB, Seattle WA USA                                                                                                         |
| 56 | Lehigh Valley Health network/Lehigh Valley Hospital Allentown, PA, USA  | Lehigh Valley Health Network/Lehigh Valley Hospital Institutional Review Board Research Participant Protection Office, Allentown, PA, USA |
