# Supplementary material for: Reduced ITPase activity and favorable IL28B genetic variant protect against ribavirin-induced anemia in interferon-free regimens
Source: PubMed Central journal article supplement (PMC5979032; doi:10.1371/journal.pone.0198296), 2018-05-31
Supplement: pone.0198296.s008.pdf [file pone.0198296.s008.pdf]

**S2 Table. PCR, pyrosequencing primers used for *IL28b* rs12979860 and *ITPA* genetic analyses**

| <b>Primer Name</b>            | <b>Primer Sequence</b>                 | <b>Amplicon Length</b> |
|-------------------------------|----------------------------------------|------------------------|
| rs12979860_Fwd                | TTGCTGGGGGAGCGCGGAG                    | <b>291</b>             |
| rs12979860_RevBio             | /5Biosg/TGCCTCTCCGCCCCACTCCC           |                        |
| rs12979860_Seq                | GCAATTCAACCCTGGTTC                     |                        |
| ITPA_rs1127354_FwdBio         | /5Biosg/TGG AAC AGG TCG TTC AGA TTC TA | <b>219</b>             |
| <i>ITPA</i> _rs1127354_Rev    | CGA ACT GCC TCC TGA CAT TT             |                        |
| <i>ITPA</i> _rs1127354_Seq    | GCC ACC AAA GTG CAT                    |                        |
| <i>ITPA</i> _rs7270101_FwdBio | /5Biosg/TGG AAC AGG TCG TTC AGA TTC TA | <b>219</b>             |
| <i>ITPA</i> _rs7270101_Rev    | CGA ACT GCC TCC TGA CAT TT             |                        |
| <i>ITPA</i> _rs7270101_Seq    | AAA TCC AAC CAT CTT TTA A              |                        |
