# Supplementary material for: Reduced ITPase activity and favorable IL28B genetic variant protect against ribavirin-induced anemia in interferon-free regimens
Source: PubMed Central journal article supplement (PMC5979032; doi:10.1371/journal.pone.0198296), 2018-05-31
Supplement: pone.0198296.s009.pdf [file pone.0198296.s009.pdf]

**S3 Table. Hardy-Weinberg Equilibrium Test Results for Biallelic *ITPA* SNPs *rs7270101* and *rs1127354* as Calculated Using Santiago Rodriguez, Tom R. Gaunt, and Ian N.M. Day 2009**

| <b>SNP Tested</b> | <b>Genotype</b> | <b>Expected</b> | <b>Observed</b> | <b>p allele Frequency</b> |
|-------------------|-----------------|-----------------|-----------------|---------------------------|
| <b>rs7270101</b>  | T/T             | 169.35          | 168             | 0.90                      |
|                   | T/G             | 54.3            | 57              | 0.88                      |
|                   | G/G             | 4.35            | 3               | 0.85                      |
| <b>rs1127354</b>  | G/G             | 188.93          | 189             | 0.90                      |
|                   | G/T             | 38.15           | 38              | 0.91                      |
|                   | T/T             | 1.93            | 2               | 0.91                      |
