# Supplementary material for: Reduced ITPase activity and favorable IL28B genetic variant protect against ribavirin-induced anemia in interferon-free regimens
Source: PubMed Central journal article supplement (PMC5979032; doi:10.1371/journal.pone.0198296), 2018-05-31
Supplement: pone.0198296.s010.pdf [file pone.0198296.s010.pdf]

**S4 Table. Mean Hb (g/dL) and Mean PLT (K/ $\mu$ L) at Baseline and End of Treatment Stratified by ITPase Functional Activity and Treatment Arm (+RBV/Placebo for RBV)**

| <b>ITPase functional activity</b> | <b>Arm</b> | <b>Number</b> | <b>Mean Hb at Baseline <math>\pm</math> SD (g/dL)</b> | <b>Mean Hb at EOT <math>\pm</math> SD (g/dL)</b> | <b>Mean PLT at Baseline <math>\pm</math> SD (K/<math>\mu</math>L)</b> | <b>Mean PLT at EOT <math>\pm</math> SD (K/<math>\mu</math>L)</b> |
|-----------------------------------|------------|---------------|-------------------------------------------------------|--------------------------------------------------|-----------------------------------------------------------------------|------------------------------------------------------------------|
| 100 %                             | +RBV       | 41            | 14.59 $\pm$ 1.28                                      | 12.22 $\pm$ 1.21                                 | 233.5 $\pm$ 56.65                                                     | 249.3 $\pm$ 56.65                                                |
|                                   | Placebo    | 93            | 14.51 $\pm$ 1.43                                      | 13.98 $\pm$ 1.44                                 | 235.8 $\pm$ 65.58                                                     | 234.5 $\pm$ 67.72                                                |
| 60%                               | +RBV       | 14            | 15.12 $\pm$ 1.53                                      | 13.15 $\pm$ 1.92                                 | 210.0 $\pm$ 33.29                                                     | 241.9 $\pm$ 52.36                                                |
|                                   | Placebo    | 36            | 14.93 $\pm$ 1.22                                      | 14.20 $\pm$ 1.25                                 | 220.7 $\pm$ 55.26                                                     | 209.4 $\pm$ 51.18                                                |
| 25-30%                            | +RBV       | 12            | 14.18 $\pm$ 1.40                                      | 13.35 $\pm$ 1.39                                 | 213.1 $\pm$ 53.14                                                     | 248.3 $\pm$ 74.64                                                |
|                                   | Placebo    | 20            | 15.49 $\pm$ 1.51                                      | 14.67 $\pm$ 1.40                                 | 230.3 $\pm$ 44.14                                                     | 227.6 $\pm$ 46.54                                                |
| $\leq$ 10%                        | +RBV       | 1             | 15.00                                                 | 12.9                                             | 237.0                                                                 | 209.0                                                            |
|                                   | Placebo    | 7             | 15.06 $\pm$ 1.47                                      | 14.69 $\pm$ 1.21                                 | 242.0 $\pm$ 112.3                                                     | 234.7 $\pm$ 96.47                                                |
