# Supplementary material for: Reduced ITPase activity and favorable IL28B genetic variant protect against ribavirin-induced anemia in interferon-free regimens
Source: PubMed Central journal article supplement (PMC5979032; doi:10.1371/journal.pone.0198296), 2018-05-31
Supplement: pone.0198296.s011.pdf [file pone.0198296.s011.pdf]

**S5 Table. Response to the 3-DAA Regimen by Measuring Sustained Virological Response at 12 Weeks Post-Treatment (SVR12)**

| ITPase functional activity | # Patients per Arm |      | Number of Patients Achieving SVR12 |      |
|----------------------------|--------------------|------|------------------------------------|------|
|                            | -RBV               | +RBV | -RBV                               | +RBV |
| 100 %                      | 93                 | 41   | 7                                  | 0    |
| 60%                        | 36                 | 14   | 0                                  | 0    |
| 25-30%                     | 20                 | 12   | 2                                  | 0    |
| ≤10%                       | 7                  | 1    | 0                                  | 0    |
